# Supplementary material
Source: Springer Nature journal article supplement (https://www.springermedizin.de/resource/supplementary/12889_2005_396_MOESM1_ESM.pdf/9501534)

Technical/Support Staff Professional Staff

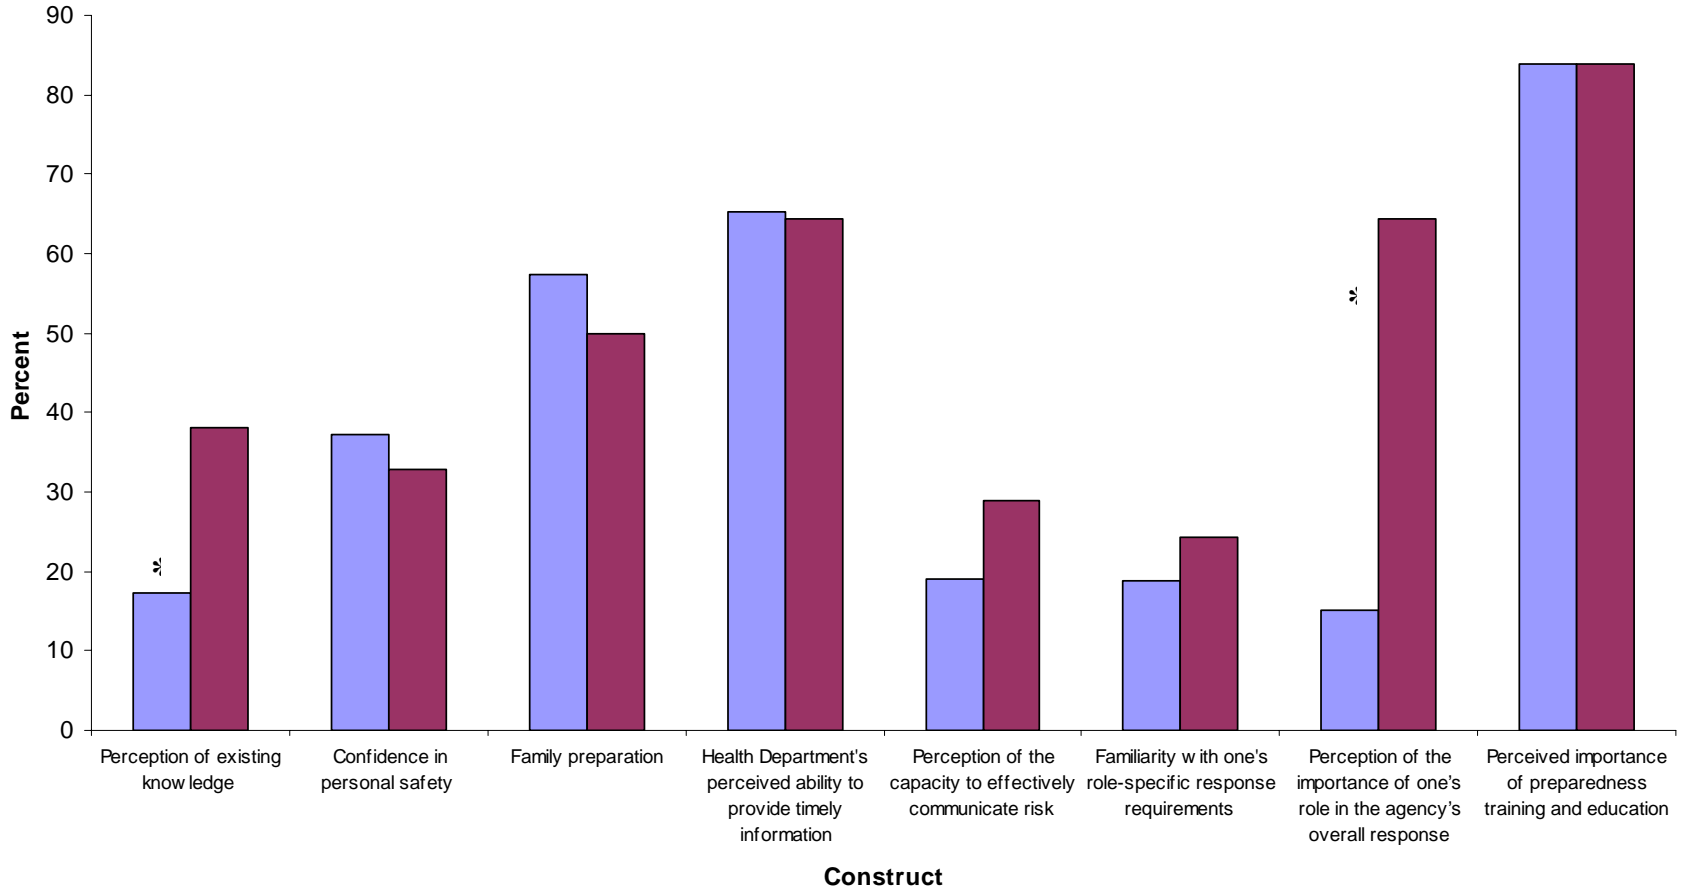

Supplement: MOESM1 [file 9501534]
